# Supplementary material for: A dual-targeting, p53-independent, apoptosis-inducing platinum(ii) anticancer complex, [Pt(BDIQQ)]Cl
Source: Royal Society of Chemistry journal article supplement (doi:10.1039/c3mt00364g), 2014-01-01
Supplement: c3mt00364g.pdf [file c3mt00364g.pdf]

## Supporting Information for

# A Dual-Targeting, p53-Independent, Apoptosis-Inducing Platinum(II) Anticancer Complex, [Pt(BDI<sup>QQ</sup>)]Cl

Kogularamanan Suntharalingam,<sup>†</sup> Justin J. Wilson,<sup>†</sup> Wei Lin,<sup>†</sup> and Stephen J. Lippard,<sup>†\*</sup>

<sup>†</sup>Department of Chemistry, Massachusetts Institute of Technology, Cambridge, Massachusetts 02139, United States

Email: lippard@mit.edu

### Content

- Table S1. IC<sub>50</sub> values (μM) of BDI<sup>QQ</sup>H against various cancerous and healthy cell lines. The errors represent standard deviations.
- Figure S1. Agarose gel electrophoresis of pUC18 DNA treated with [Pt(BDI<sup>QQ</sup>)]Cl after 6 h incubation at 37 °C.
- Figure S2. Histograms representing the different phases of the cell cycle for A549 cells in the absence and presence of cisplatin (5 μM) or [Pt(BDI<sup>QQ</sup>)]Cl (2 μM) over the course of 72 h.
- Figure S3. Immunoblotting analysis of proteins related to the apoptosis pathway.
- Figure S4. Fluorescence microscopy images of A549 cells untreated and treated with cisplatin (2 μM for 12 h) and then stained with Hoechst 33258 and MitoTracker Green.
- Figure S5. The mean intensity of red fluorescence emitted by JC-1 stained HCT116 p53<sup>+/+</sup> and HCT116 p53<sup>-/-</sup> cells in the absence or presence of [Pt(BDI<sup>QQ</sup>)]Cl (5 μM for 48 h).
- Figure S6. Platinum content in the mitochondria extracted from HCT116 p53<sup>+/+</sup> and HCT116 p53<sup>-/-</sup> cells dosed with [Pt(BDI<sup>QQ</sup>)]Cl (10 μM for 12 h).
- Figure S7. IC<sub>50</sub> values (in μM) of [Pt(BDI<sup>QQ</sup>)]Cl and cisplatin against HCT116 p53<sup>+/+</sup> and HCT116 p53<sup>-/-</sup> cells after 72 h incubation.
- Figure S8. FITC Annexin V/PI binding assay plots of untreated cells (-ve control), cells treated with doxorubicin (0.5 μM for 12 h), and [Pt(BDI<sup>QQ</sup>)]Cl (5 μM for 72 h).
- Table S2. Data obtained from the FITC Annexin V/PI binding assay. Lower right quadrant represents cells undergoing early-stage apoptosis.
- Figure S9. Fluorescence microscopy images of A549 cells untreated and treated with [Pt(BDI<sup>QQ</sup>)]Cl (20 μM for 12 h), and then stained with Hoechst 33258. The arrows indicate membrane blebbing and nuclear regions with intense staining.

**Table S1.** IC<sub>50</sub> values (μM) of BDI<sup>QQ</sup>H against various cancerous and healthy cell lines. The errors represent standard deviations.

| Cell line | Cancer type       | BDI <sup>QQ</sup> H |
|-----------|-------------------|---------------------|
| A549      | Lung carcinoma    | > 100               |
| A2780     | Ovarian carcinoma | 53.0 ± 0.6          |
| A2780CP70 | Ovarian carcinoma | 46.5 ± 6.9          |
| MRC-5     | Lung fibroblast   | 67.3 ± 10.0         |

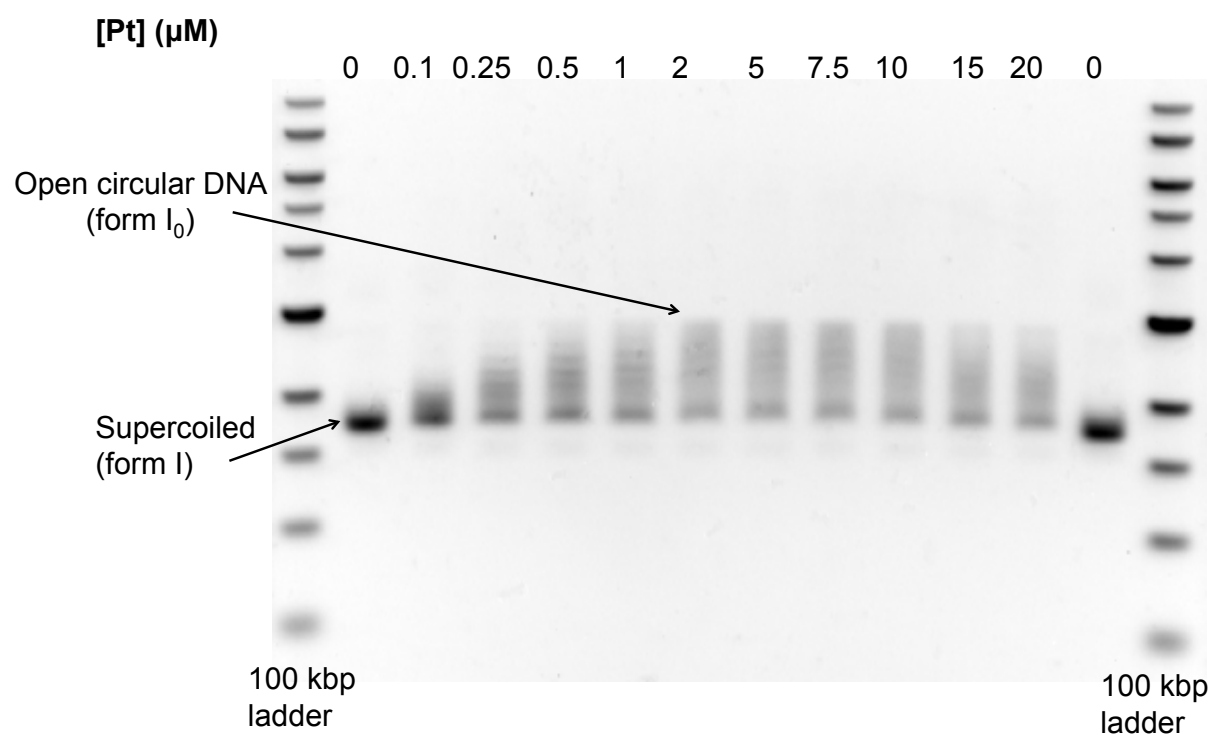

**Figure S1.** Agarose gel electrophoresis of pUC18 DNA treated with [Pt(BDI<sup>QQ</sup>)]Cl after 6 h incubation at 37 °C. Lane 1: DNA ladder; lane 2: DNA only; lanes 3-12: DNA + 0.1, 0.25, 0.5, 1, 2, 5, 7.5, 10, 15, and 20 μM of [Pt(BDI<sup>QQ</sup>)]Cl; lane 13: DNA only; lane 14: DNA ladder.

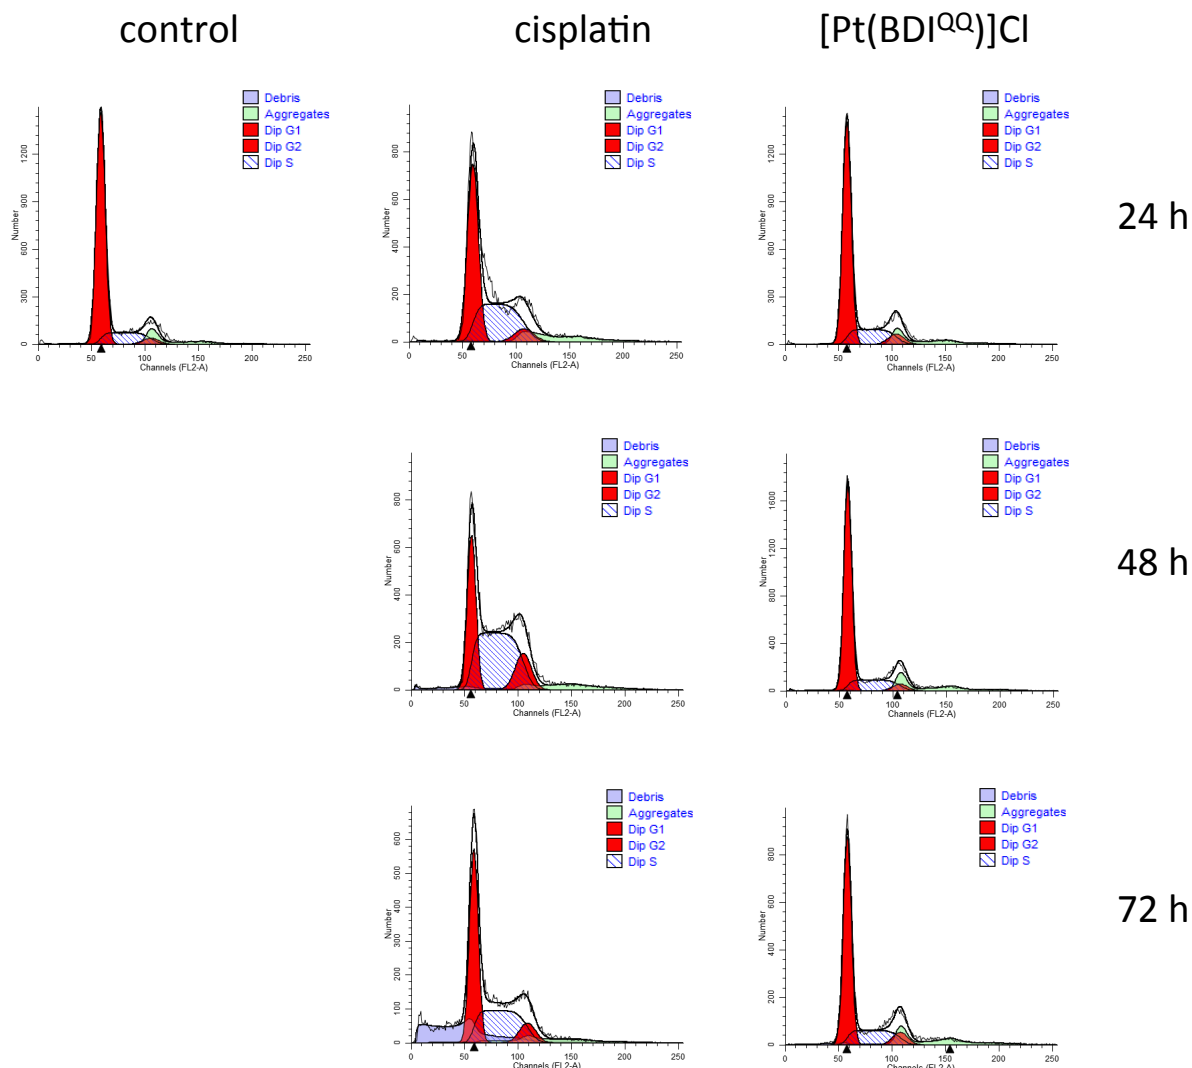

**Figure S2.** Histogram representing the different phases of the cell cycle for A549 cells in the absence and presence of cisplatin (5  $\mu$ M) or [Pt(BDI<sup>QQ</sup>)]Cl (2  $\mu$ M) over the course of 72 h. untreated control: G1: 78.2%, S: 18.1%, G2/M: 3.7%. 24 h treated with cisplatin: G1: 51.7%, S: 41.6%, G2/M: 6.7%. 48 h treated with cisplatin: G1: 31.3%, S: 55.1%, G2/M: 13.6%. 72 h treated with cisplatin: G1: 50.0%, S: 40.5%, G2/M: 9.4%, Debris: 23.7%. 24 h treated with [Pt(BDI<sup>QQ</sup>)]Cl: G1: 71.7%, S: 22.2%, G2/M: 6.0%. 48 h treated with [Pt(BDI<sup>QQ</sup>)]Cl: G1: 74.7%, S: 20.6%, G2/M: 6.3%. 72 h treated with [Pt(BDI<sup>QQ</sup>)]Cl: G1: 68.1%, S: 24.4%, G2/M: 7.5%,

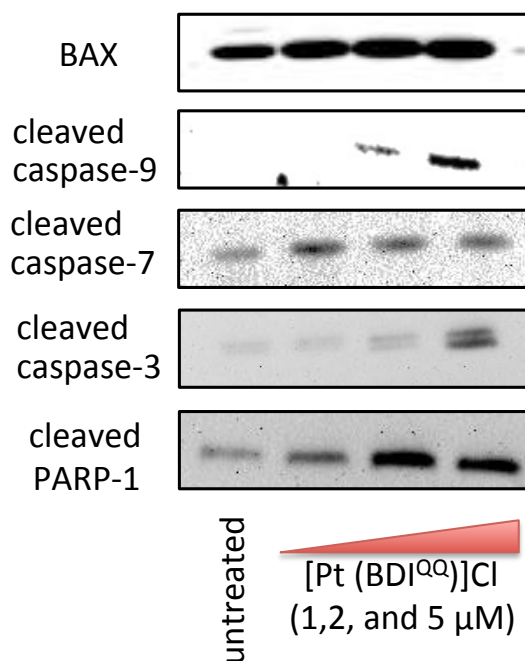

**Figure S3.** Immunoblotting analysis of proteins related to the apoptosis pathway. Protein expression in A549 cells following treatment with Pt(BDI<sup>OQ</sup>)]Cl (1–5 μM) after 72 h incubation. Whole cell lysates were resolved by SDS-PAGE and analyzed by immunoblotting against BAX, cleaved caspase-9, cleaved caspase-7, cleaved caspase-3, and cleaved PARP-1.

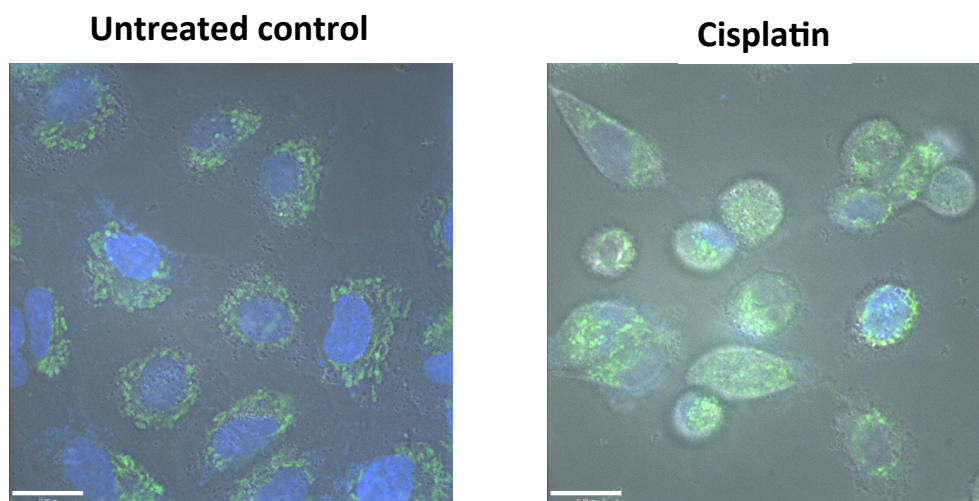

**Figure S4.** Fluorescence microscopy images of A549 cells untreated and treated with cisplatin (2 μM for 12 h), and then stained with Hoechst 33258 and MitoTracker Green. Scale bar = 21 μm.

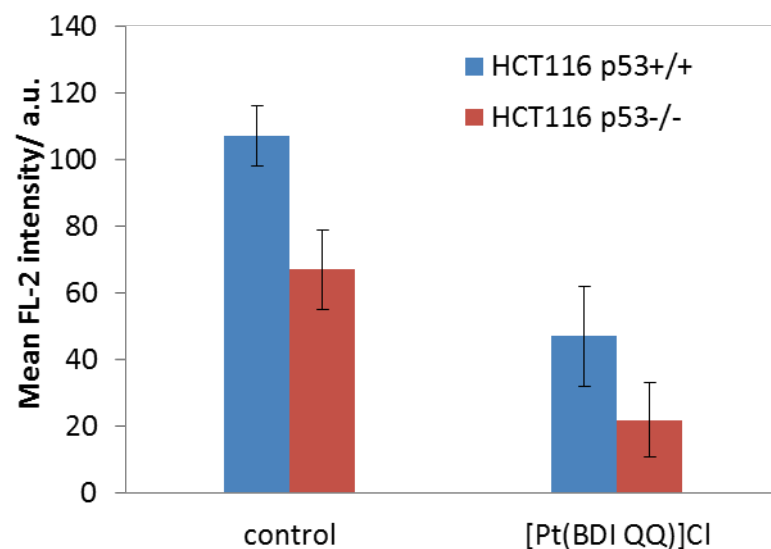

**Figure S5.** The mean intensity of red fluorescence emitted by JC-1 stained HCT116 p53+/+ and HCT116 p53-/- cells in the absence or presence of [Pt(BDI<sup>QQ</sup>)]Cl (5  $\mu$ M for 48 h).

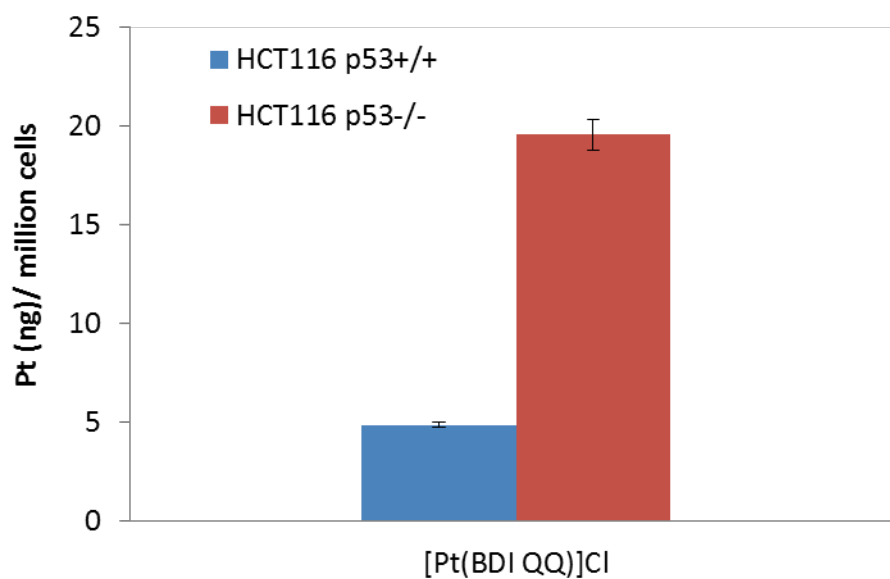

**Figure S6.** Platinum content in the mitochondria extracted from HCT116 p53+/+ and HCT116 p53-/- cells dosed with [Pt(BDI<sup>QQ</sup>)]Cl (10  $\mu$ M for 12 h).

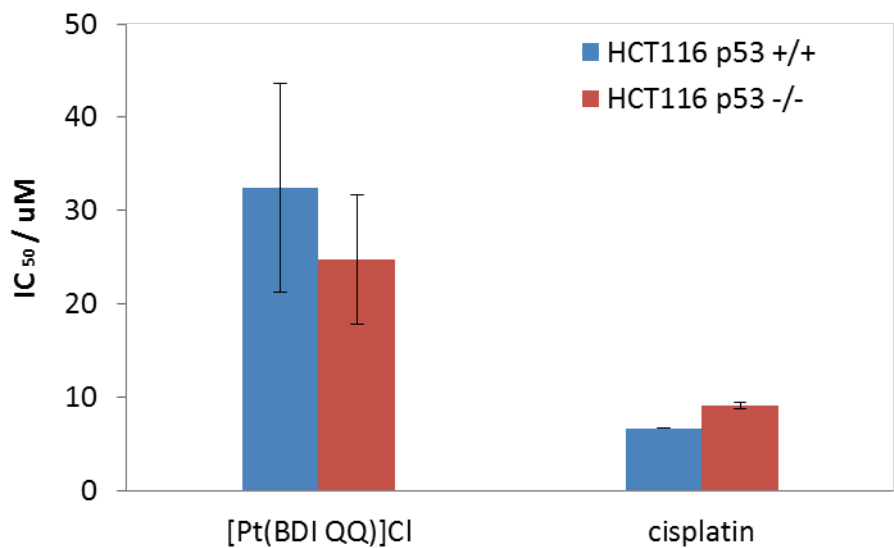

**Figure S7.** IC<sub>50</sub> values (in μM) of [Pt(BDI<sup>QQ</sup>)]Cl and cisplatin against HCT116 p53+/+ and HCT116 p53-/- cells after 72 h incubation.

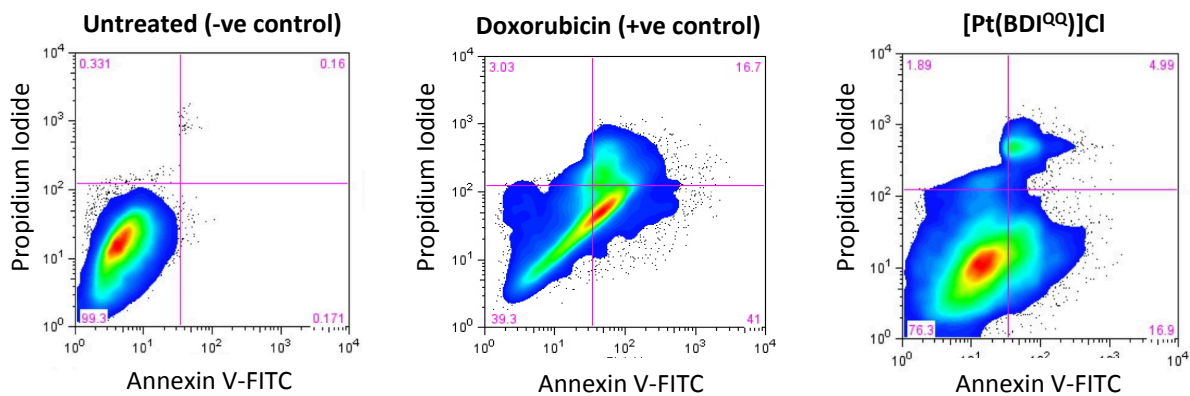

**Figure S8.** Representation of FITC Annexin V/PI binding assay plots of untreated cells (-ve control), cells treated with doxorubicin (0.5 μM for 12 h), and Pt(BDI<sup>QQ</sup>)]Cl (5 μM for 72 h).

**Table S2.** Data obtained from the FITC Annexin V/PI binding assay. Lower right quadrant represents cells undergoing early-stage apoptosis.

| Quadrant    | Untreated    | Doxorubicin   | Pt(BDI <sup>QQ</sup> )]Cl |
|-------------|--------------|---------------|---------------------------|
| Upper left  | 1.03 ± 0.99  | 0.79 ± 0.29   | 2.40 ± 0.71               |
| Upper Right | 1.27 ± 1.56  | 9.54 ± 4.85   | 3.52 ± 2.00               |
| Lower Left  | 96.45 ± 4.03 | 53.65 ± 23.83 | 80.85 ± 6.43              |
| Lower Right | 1.21 ± 1.47  | 36.05 ± 15.34 | 13.27 ± 5.13              |

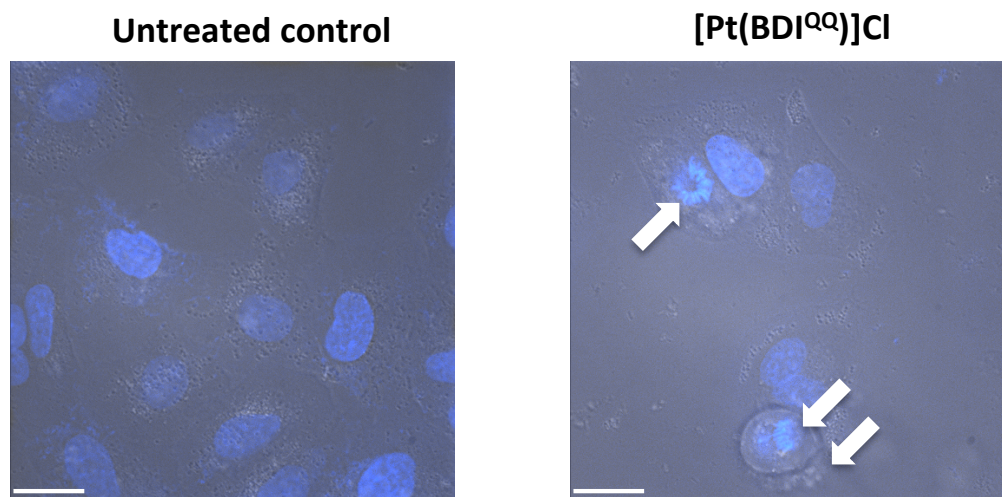

**Figure S9.** Fluorescence microscopy images of A549 cells untreated and treated with [Pt(BDI<sup>QQ</sup>)]Cl (20  $\mu$ M for 12 h), and then stained with Hoechst 33258. The arrows indicate membrane blebbing and nuclear regions with intense staining. Scale bar = 21  $\mu$ m.
